# Supplementary material for: Negative magnetization, complex magnetic ordering and applications of Cr-doped Co2TiO4
Source: Royal Society of Chemistry journal article supplement (doi:10.1039/c9cp06444c), 2020-01-01
Supplement: c9cp06444c4.pdf [file c9cp06444c4.pdf]

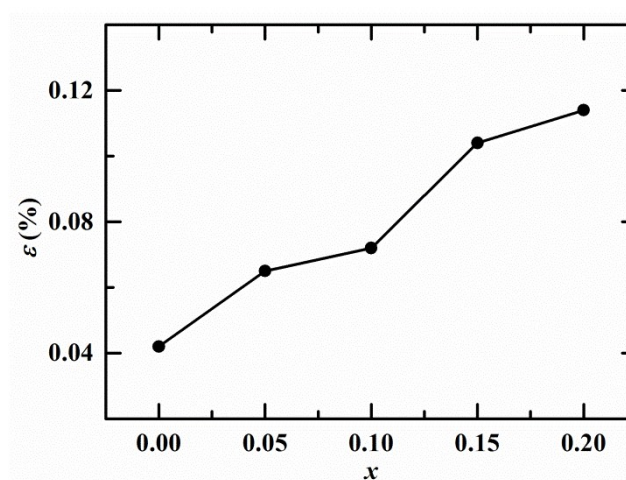

**Fig. S1** The lattice strain as a function of  $\text{Cr}^{3+}$  doping content  $x$ .

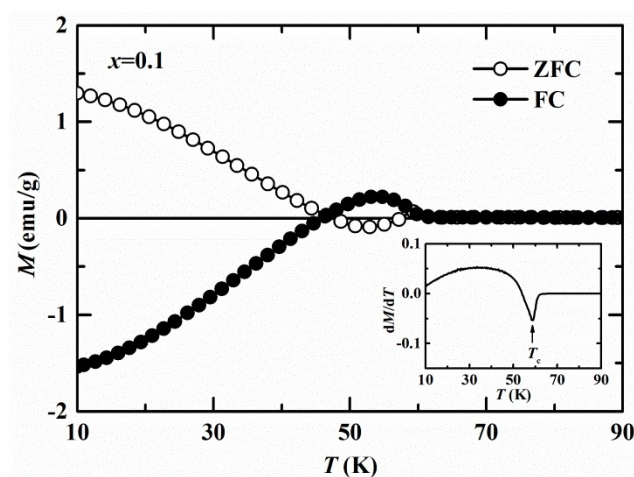

**Fig. S2** Temperature dependence of dc magnetization under ZFC and FC conditions with a magnetic field of 100 Oe for the  $x=0.1$  sample. The inset shows derivative  $dM/dT$  vs  $T$  of the FC data.
