# Supplementary figures and images for: Negative magnetization, complex magnetic ordering and applications of Cr-doped Co2TiO4
Source: Royal Society of Chemistry journal article supplement (doi:10.1039/c9cp06444c), 2020-01-01

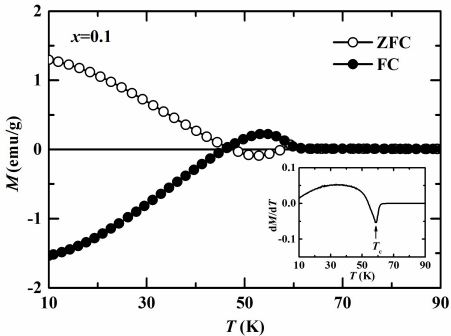

Supplement: c9cp06444c3.pdf [file c9cp06444c3.pdf]
